# Supplementary material for: Asynchronous cracking with dissimilar paths in multilayer graphene
Source: Royal Society of Chemistry journal article supplement (doi:10.1039/c7nr04443g), 2017-01-01
Supplement: c7nr04443g1.pdf [file c7nr04443g1.pdf]

**Supplementary**

**Asynchronous cracking with dissimilar paths  
in multilayer graphene**

Bongkyun Jang,<sup>\*ab</sup> Byungwoon Kim,<sup>a</sup> Jae-Hyun Kim,<sup>b</sup> Hak-Joo Lee,<sup>bc</sup> Takashi Sumigawa,<sup>a</sup>  
Takayuki Kitamura<sup>a</sup>

<sup>a</sup> Department of Mechanical Engineering and Science, Kyoto University, Nishikyo-ku, Kyoto  
615-8540, Japan

<sup>b</sup> Department of Nano Mechanics, Korea Institute of Machinery and Materials, Yuseong-gu,  
Daejeon 34103, Republic of Korea

<sup>c</sup> Center for Advanced Meta-Materials (CAMM), Yuseong-gu, Daejeon 34103, Republic of  
Korea

\*Corresponding author : [jangbk@kimm.re.kr](mailto:jangbk@kimm.re.kr)

## S1 Characterization of graphene specimens for fracture tests

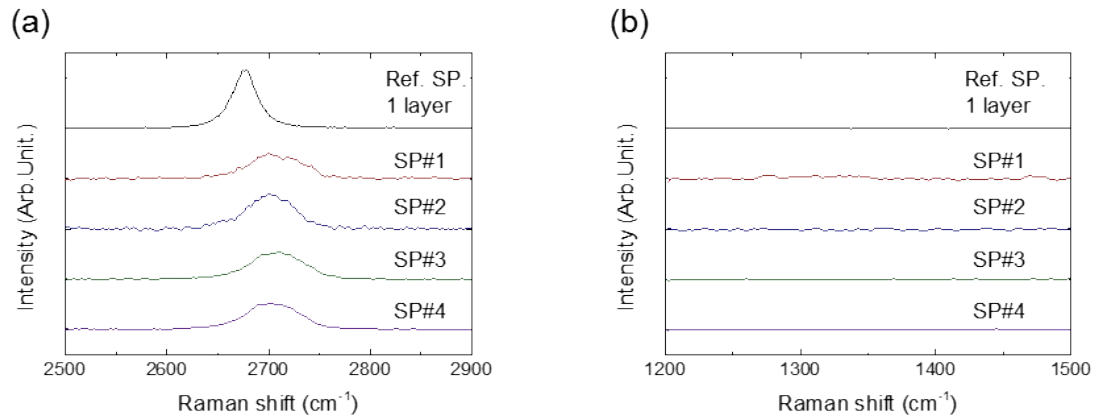

**Figure S1** Raman spectrum of the specimens tested in this study. (a) 2D band and (b) D band. Shape of 2D band implies that the layers of the multilayer graphene specimens are stacked in Bernal configuration. Also, small D band explain that the specimens have few atomic disorders or defects.

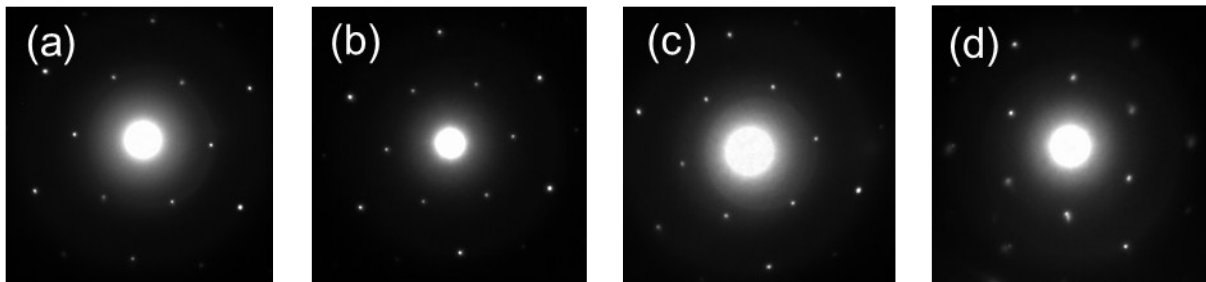

**Figure S2** Diffraction patterns (a)–(d) of graphene tensile specimen (SP#1–SP#4) obtained by transmission electron microscope. This shows that the pristine graphene specimens are single crystal.

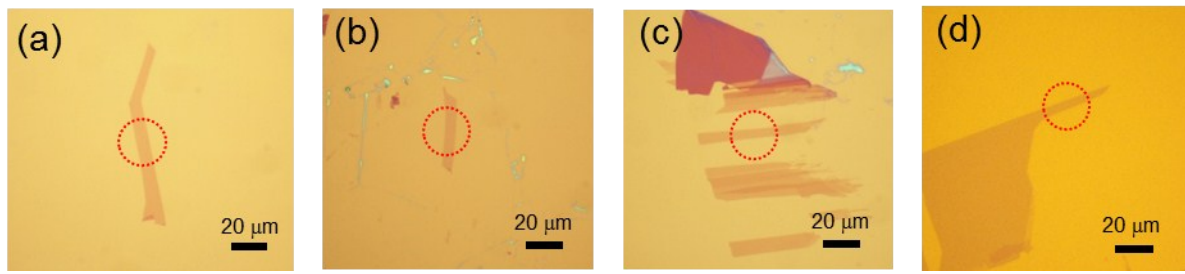

**Figure S3** Optical microscope image (a)-(d) of the tested graphene specimen (SP#1-SP#4) exfoliated from highly oriented pyrolytic graphite. Red dotted circles indicate the specimen with strip shape. In the images, the number of the layers can be identified with the contrasts.<sup>S1</sup> However, they show uniform contrast in the entire region of the specimen. This means that the entire regions of the specimens are the same thickness.

### S3 Crack propagation direction in multilayer structure

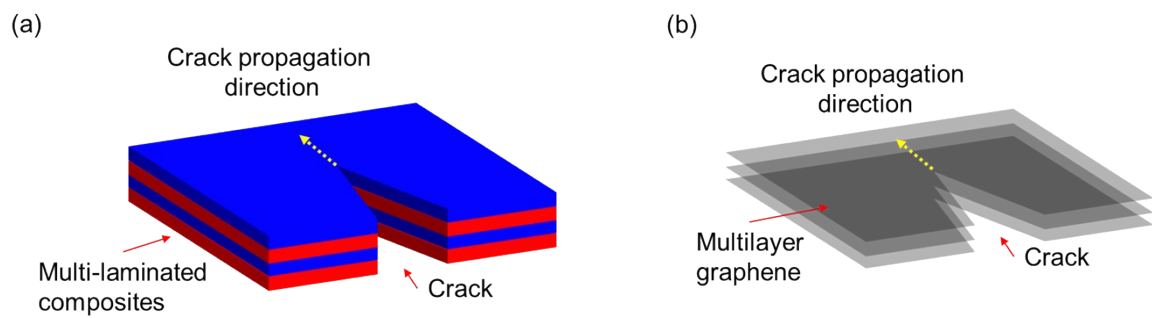

**Figure S4.** Crack divider orientation in multilayer structure (yellow dotted arrow). (a) Multi-laminated composites, (b) Multilayer graphene.

### **S3 *In-situ* movie clips of fracture testing**

**Supplimentary Movie 1** Movie clips taken by SEM during the *in-situ* fracture testing for SP#2.

#### **References**

S1 W. Quyang, X.-Z. Liu, Q. Li, Y. Zhang, J. Yang, Q. Zheng, *Nanotechnology*, 2013, **24**, 505701.
